# Supplementary material
Source: Springer Nature journal article supplement (https://www.springermedizin.de/resource/supplementary/12913_2011_1988_MOESM1_ESM.pdf/9530014)
Supplement: MOESM1 [file 9530014]

ENROLLMENT

Study information & invitation to all patients scheduled for a hysterectomy or laparoscopic adnexal surgery

Excluded: declined to participate / not meeting inclusion criteria

Informed Consent (IC) & Baseline Questionnaire (BQ)

Excluded: no agreement IC / BQ not finished in time

ALLOCATION

Randomization

E-health intervention & adjusted usual care (n=106)

Placebo e-health intervention & normal usual care (n=106)

Surgery

FOLLOW-UP

Follow-up questionnaires at 2, 6, 12 and 26 weeks after surgery

10 weeks after surgery:  
full return to work?

Yes

No

Integrated care protocol & (when appropriate) workplace intervention

ANALYSIS

Expected loss to follow-up: 10%

Intervention group: n = 96

Usual care group: n = 96
